# Supplementary material
Source: PubMed Central journal article supplement (PMC2666599)
Supplement: M808475200_1.pdf [file M808475200_1.pdf]

SUPPLEMENTARY MATERIAL

Figure S1

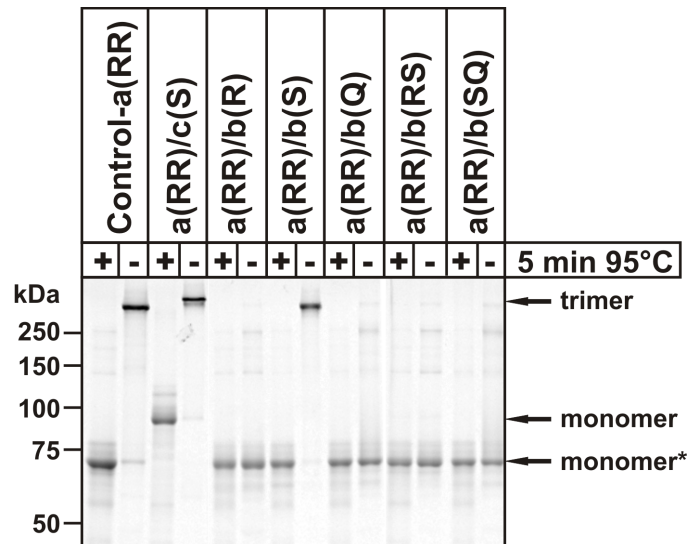

FIGURE S1. **Complex formation of enzymatically inactive  $\Delta$ N-endoNF-a(RR) variants.** Affinity purified proteins were analyzed in 7% SDS-PAGE. To determine SDS-resistance (*trimer*) of the respective variant, the initial boiling step (+) in the presence of 1% (w/v) SDS was omitted (-). *Monomer* indicates the monomeric non-cleavable mutant c(S), whereas all other mutants were found proteolytically processed (*monomer\**). Numbers on the left side represent protein standards.

TABLE S1

**Quaternary structure of  $\Delta$ N-endoNF variants.** The oligomeric state of the indicated endoNF variants was determined for affinity-purified proteins by size-exclusion chromatography. Of each protein 480  $\mu$ g were loaded in 300  $\mu$ l onto the column. The oligomeric state was calculated from the values obtained by size-exclusion chromatography divided by the mass calculated for the monomer from the amino acid sequences including the N-terminal Strep-tag II (76.1 kDa).

| EndoNF variant | Molecular mass<br>(size-exclusion<br>chromatography)<br><i>kDa</i> | Oligomeric<br>state |
|----------------|--------------------------------------------------------------------|---------------------|
| Control-a(RR)  | 225.7                                                              | 3.0                 |
| a(RR)/b(R)     | 256.8                                                              | 3.4                 |
| a(RR)/b(S)     | 252.6                                                              | 3.3                 |
| a(RR)/b(Q)     | 239.5                                                              | 3.1                 |
| a(RR)/b(RS)    | 245.3                                                              | 3.2                 |
| a(RR)/b(SQ)    | 231.2                                                              | 3.0                 |
